# Supplementary material
Source: publisher figshare collection journal article supplement (https://acs.figshare.com/ndownloader/files/5055268)

## Supporting Information:

### Deposition of DNA-functionalized Gold Nanospheres into Nanoporous Surfaces

Original images of figures that were manually colorized to highlight the DNA-Au nanospheres deposited into the nanopores:

**Figure 3:**

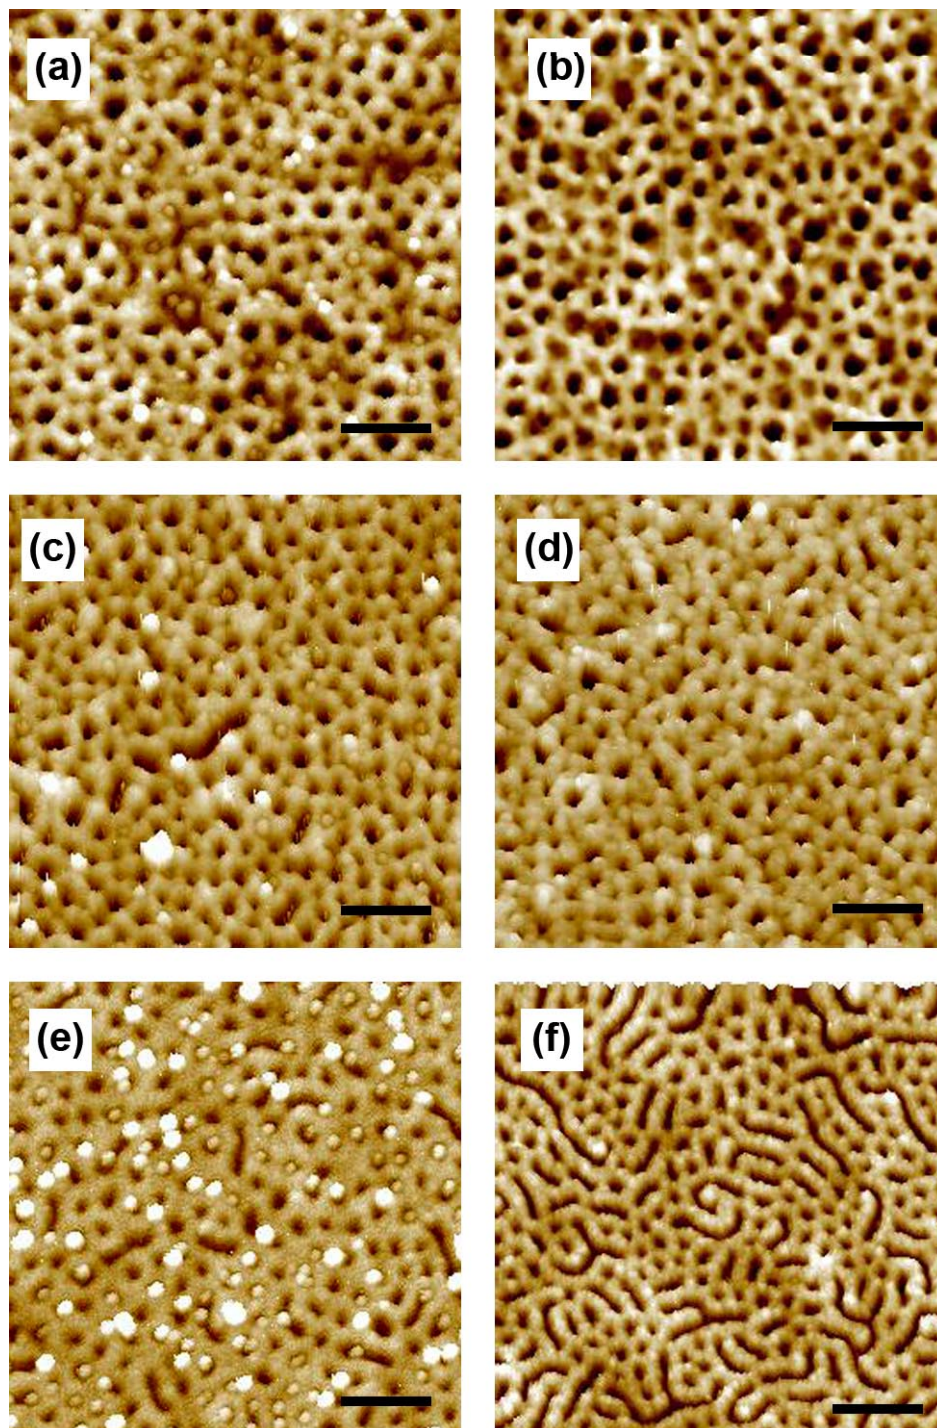

**Figure 5:**

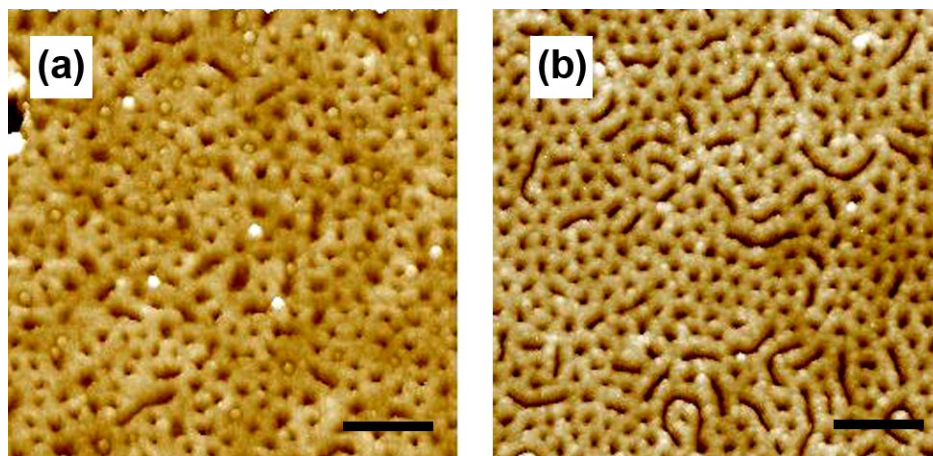

Supplement: Supplementary file 1 [file 5055268]
